# Supplementary material
Source: publisher site journal article supplement (https://www.dovepress.com/article/593477)
Supplement: Supplementary file 1 [file 593477%20Revised%20Supplementary%20Material.docx]

**Supplementary Figure**


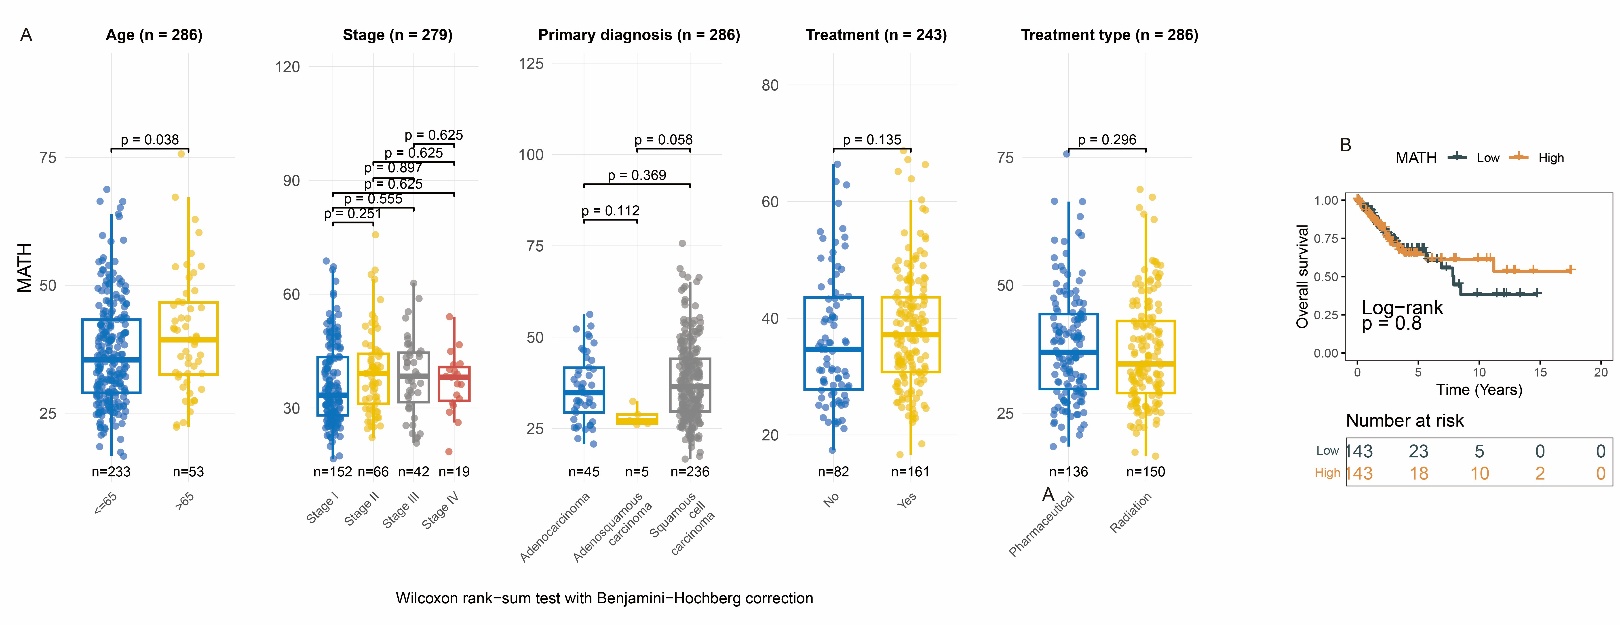


**Fig. S1** Clinical correlation analysis of MATH score. **(A)** Association between MATH score and clinicopathological characteristics. **(B)** Association between MATH score and overall survival prognosis in CESC. MATH: Mutant-Allele Tumor Heterogeneity. CESC: Cervical Squamous Cell Carcinoma and Endocervical Adenocarcinoma.
